# Supplementary material
Source: PubMed Central journal article supplement (PMC10767641)
Supplement: jamaoncol-e235791-s002.pdf [file jamaoncol-e235791-s002.pdf]

## Supplemental Online Content

Yang Z, Meng J, Mei X, et al. Brain radiotherapy with pyrotinib and capecitabine in patient with *ERBB2*-positive advanced breast cancer and brain metastases: a nonrandomized phase 2 trial. *JAMA Oncol*. Published online January 4, 2024. doi:10.1001/jamaoncol.2023.5791

**eTable 1.** Intracranial progression sites

**eTable 2.** Extracranial progression sites

**eTable 3.** Maintenance of neurocognitive function evaluated by MMSE

This supplemental material has been provided by the authors to give readers additional information about their work.

**eTable 1. Intracranial progression sites (n=21)**

|                                       | No. of patients |            |
|---------------------------------------|-----------------|------------|
|                                       | FSRT (n=12)     | WBRT (n=9) |
| <b>Intracranial progression sites</b> |                 |            |
| New lesions                           | 7               | 6          |
| Primary lesions                       | 4 <sup>a</sup>  | 0          |
| Both new and primary lesions          | 1 <sup>a</sup>  | 3          |

Abbreviations: FSRT, fractionated stereotactic radiotherapy; WBRT, whole-brain radiotherapy.

<sup>a</sup>Among the five patients with progression in the primary intracranial lesions who were treated with FSRT, four had a maximum tumor diameter greater than 3 cm.

**eTable 2. Extracranial progression sites (n=8)**

|                                                       | No. of patients |
|-------------------------------------------------------|-----------------|
| <b>Extracranial progression only</b>                  |                 |
| Chest wall                                            | 1               |
| Lung                                                  | 1               |
| <b>Both intracranial and extracranial progression</b> |                 |
| Lung <sup>a</sup>                                     | 2               |
| Lung and pleura <sup>b</sup>                          | 1               |
| Lung and chest wall                                   | 1               |
| Bone                                                  | 1               |
| Bone, soft tissue and skin                            | 1               |

<sup>a</sup>One of two patients with intracranial progression and lung metastasis subsequently died due to aggravation of lung metastasis.

<sup>b</sup>The patient with intracranial progression and lung and pleura metastases subsequently died due to aggravation of extracranial metastases.

**eTable 3. Maintenance of neurocognitive function evaluated by MMSE**

|                                                           | <b>Total<br/>(n=40)</b> | <b>FSRT<br/>(n=29)</b> | <b>WBRT<br/>(n=11)</b> | <b>P</b> |
|-----------------------------------------------------------|-------------------------|------------------------|------------------------|----------|
| <b>No. of patients who completed</b>                      | 28 (70)                 | 22 (76)                | 6 (55)                 | --       |
| <b>MMSE at baseline</b>                                   |                         |                        |                        |          |
| <b>MMSE score at baseline</b>                             | 27 (25.8-29)            | 28 (26-29)             | 26.5 (25.3-27)         | --       |
| ≥ 27                                                      | 17 (61)                 | 14 (64)                | 3 (50)                 | --       |
| <b>Maintained neurocognitive<br/>function<sup>a</sup></b> |                         |                        |                        |          |
| 2 months after RT                                         | 20/22 (91)              | 17/17 (100)            | 3/5 (60)               | .04      |
| 8 months after RT                                         | 19/20 (95)              | 15/15 (100)            | 4/5 (80)               | .25      |
| 12 months after RT                                        | 13/14 (93)              | 11/11 (100)            | 2/3 (67)               | .21      |
| 24 months after RT                                        | 6/6 (100)               | 4/4 (100)              | 2/2 (100)              | > .99    |

Data are No. (%) or median (interquartile range), unless otherwise indicated.

Abbreviations: MMSE, Mini-Mental State Examination; RT, radiotherapy; FSRT, fractionated stereotactic radiotherapy; WBRT, whole-brain radiotherapy.

<sup>a</sup>Maintained neurocognitive function was defined as reduction in MMSE score by no more than 2 points from baseline. The denominator was the number of surviving patients who completed MMSE at each time point. Fisher's exact test (2-sided) was used to compare the two radiotherapy subgroups.
