# Supplementary material
Source: PubMed Central journal article supplement (PMC10767641)
Supplement: jamaoncol-e235791-s003.pdf [file jamaoncol-e235791-s003.pdf]

## Data Sharing Statement

Yang. Brain Radiotherapy With Pyrotinib and Capecitabine in Patients With ERBB2-Positive Advanced Breast Cancer and Brain Metastases. *JAMA Oncol.* Published January 04, 2024.  
doi:10.1001/jamaoncol.2023.5791

### Data

**Data available:** Yes

**Data types:** Deidentified participant data

**How to access data:** [guoxm1800@163.com](mailto:guoxm1800@163.com) or [yyzhi2014@163.com](mailto:yyzhi2014@163.com)

**When available:** With publication

### Supporting Documents

**Document types:** None

### Additional Information

**Who can access the data:** researchers whose proposed use of the data has been approved

**Types of analyses:** Any

**Mechanisms of data availability:** After approval of proposal
